# Supplementary material
Source: Springer Nature journal article supplement (https://www.springermedizin.de/resource/supplementary/13023_2013_685_MOESM4_ESM.pdf/9642664)

# Loss of walking ability

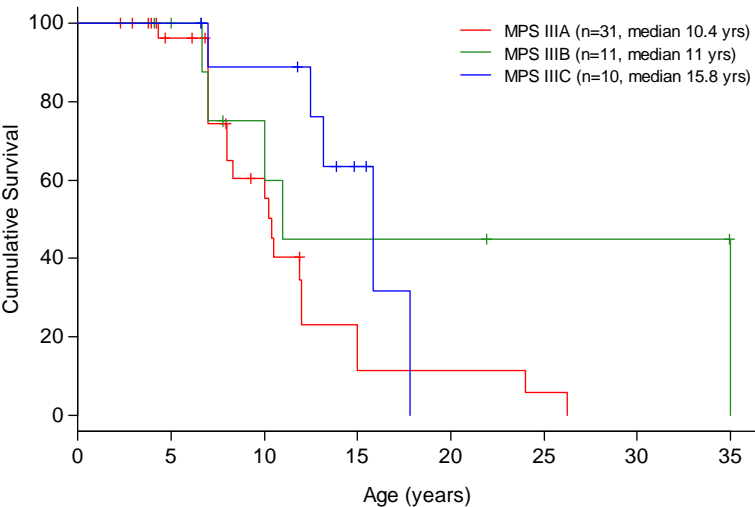

Supplement: MOESM4 [file 9642664]
